# Supplementary material for: A quantitative transmetalation with a metal organic framework compound in a solid–liquid interface reaction: synthesis, structure, kinetics, spectroscopy and electrochemistry
Source: Royal Society of Chemistry journal article supplement (doi:10.1039/c9ce00021f), 2019-01-01
Supplement: c9ce00021f1.pdf [file c9ce00021f1.pdf]

## Electronic Supporting Information

### **A quantitative transmetalation with a metal organic framework compound in a solid-liquid interface reaction: synthesis, structure, kinetics, spectroscopy and electrochemistry**

Suresh Bommakanti and Samar K. Das\*

School of Chemistry, University of Hyderabad, P.O. Central University, Hyderabad 500046, India.

#### **Table of contents**

|                   |                                                                                                  |       |       |
|-------------------|--------------------------------------------------------------------------------------------------|-------|-------|
| <b>Section 1:</b> | Powder X-ray diffraction patterns of the compounds <b>1–3</b>                                    | ----- | 2     |
| <b>Section 2:</b> | Electrochemical properties of the ligand and compounds <b>1</b> and <b>2</b>                     | ----- | 3     |
| <b>Section 3:</b> | FESEM experiments of compound <b>2</b>                                                           | ----- | 4-6   |
| <b>Section 4:</b> | Inductively Coupled Plasma (ICP) analysis of compound <b>2</b>                                   | ----- | 7     |
| <b>Section 5:</b> | Additional crystal structure images of compounds <b>1-3</b>                                      | ----- | 8     |
| <b>Section 6:</b> | Optical images of compounds <b>1</b> and <b>2</b>                                                | ----- | 9     |
| <b>Section 7:</b> | CHNS analyses of compounds <b>1-3</b>                                                            | ----- | 10-12 |
| <b>Section 8:</b> | Infrared spectra (IR) of compounds <b>1-3</b>                                                    | ----- | 13-15 |
| <b>Section 9:</b> | Selected bond lengths and bond angles found in the<br>crystal structures of compounds <b>1-3</b> | ----- | 16-18 |

## SECTION-1

### Powder X-ray diffraction (PXRD) patterns of the compounds 1–3

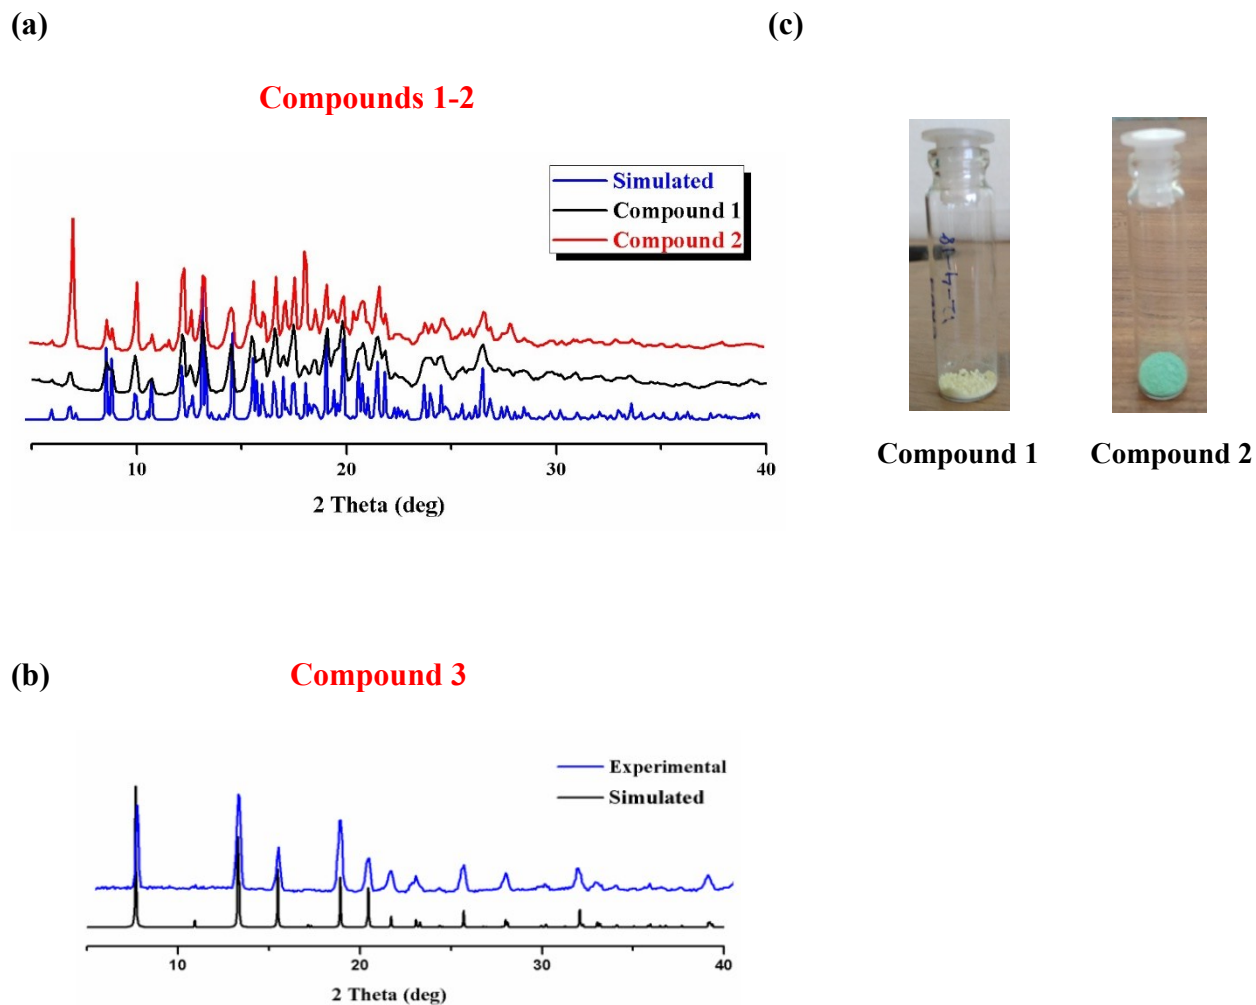

**Fig. S1.** (a) Experimental powder X-ray diffraction (PXRD) patterns of the compounds **1** (black) and **2** (red), including the simulated pattern (blue), obtained from SCXRD data of compound **1** (since both the compounds are isomorphous to each other, the simulated pattern of compound **1** is chosen for comparison). (b) PXRD patterns of the compound **3**, (blue plot-experimental; black plot-simulated). (c) Optical images of powdered samples of compounds **1** (right) and **2** (left), before and after transmetalation, respectively, clearly showing colour change from light yellow to green.

## SECTION-2

### Sample Preparation.

4 mg of the compound/ligand and 1 mg of carbon black were weighed into a sample vial, to which 1 mL of ethanol and Milli-Q water mixture (3:2) and 10  $\mu\text{L}$  of Nafion was added, the resulting suspension was sonicated for 30-40 min. From this mixture, 10  $\mu\text{L}$  of sample was drop casted on Glassy Carbon (GC) electrode, which then used as working electrode against the Ag/AgCl reference electrode.

### Electrochemical properties of 1,4-bpeb ligand and compounds 1 and 2.

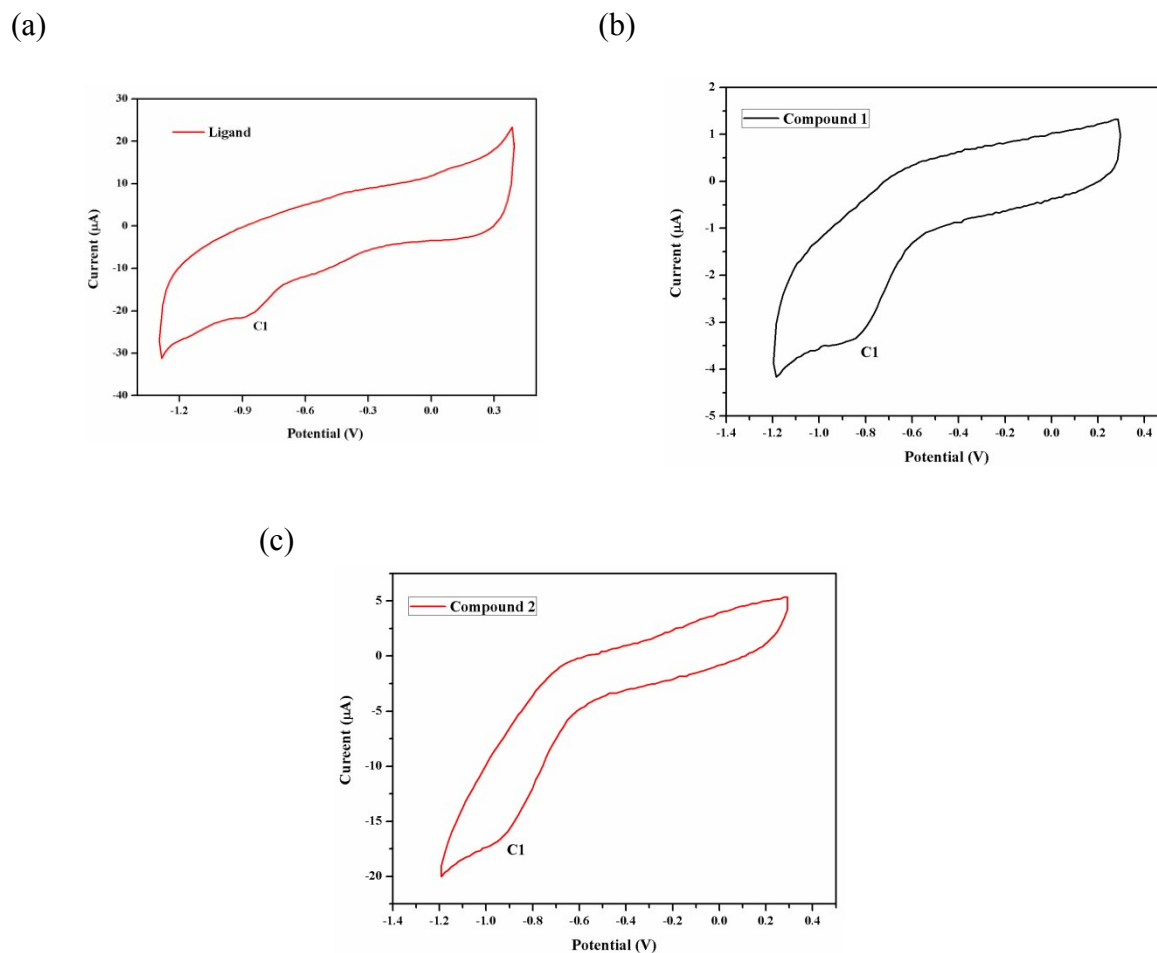

**Fig. S2.** Cyclic voltammograms (CVs) of (a) 1,4-bpeb ligand in 0.1 M Na<sub>2</sub>SO<sub>4</sub> aqueous solution; (b–c) compounds **1** and **2** in acetonitrile (MeCN) solvent using tetra butyl ammonium tetra fluoroborate (TBABF<sub>4</sub>) as supporting electrolyte. In all the cases, Ag/AgCl electrode was used as reference electrode at a scan rate of 100 mV/s.

## SECTION-3

### A. FESEM experiments of compound 2 in 0.05 M Cu(II) solution

(a)

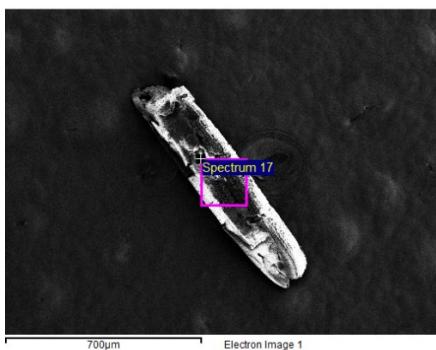

(b)

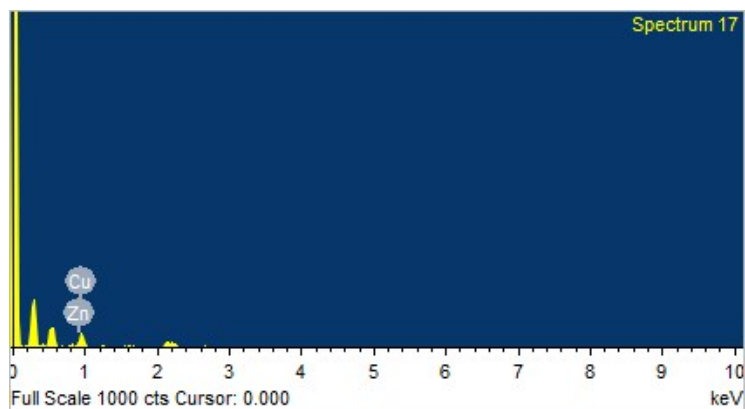

(c)

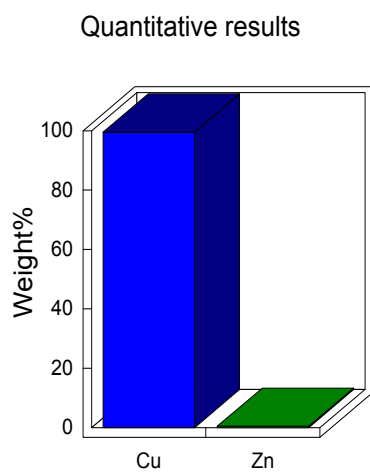

(d)

| Element | Weight% | Atomic% |
|---------|---------|---------|
| Cu L    | 99.52   | 99.53   |
| Zn L    | 0.48    | 0.47    |
| Totals  | 100.00  |         |

**Fig. S3.** (a) SEM image of single crystal of compound **2** in **0.05 M Cu(II)** solution. (b) The corresponding EDX plot. (c) Graphical representation (in weight percentages) of the metal content in compound **2**. (d) EDX results showing metal composition (as %) in **2**, after completion of transmetalation reaction.

## **B. FESEM experiments of compound 2 in 0.1 M Cu(II) solution**

(a)

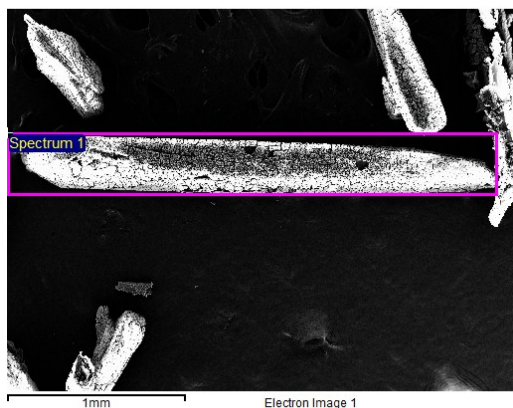

(b)

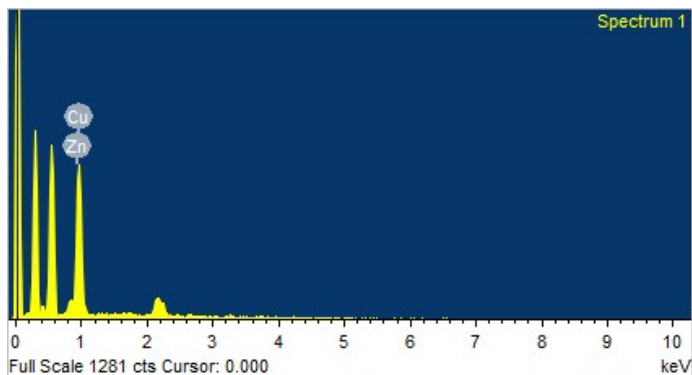

(c)

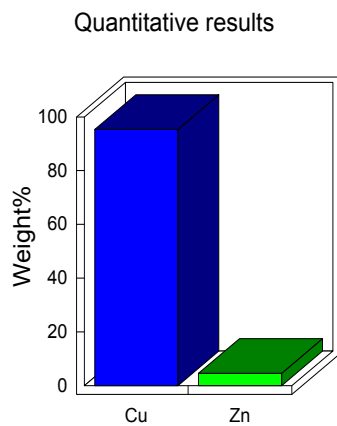

(d)

| Element | Weight% | Atomic% |
|---------|---------|---------|
| Cu L    | 95.37   | 95.50   |
| Zn L    | 4.63    | 4.50    |
| Totals  | 100.00  |         |

**Fig. S4.** (a) SEM image of single crystal of compound **2** in **0.1 M** Cu(II) solution. (b) The corresponding EDX plot. (c) Graphical representation (in weight percentages) of the metal content in compound **2**. (d) EDX results showing metal composition (as %) in **2**, after 2 days of soaking.

### C. FESEM experiments of compound 2 in 0.01 M Cu(II) solution

(a)

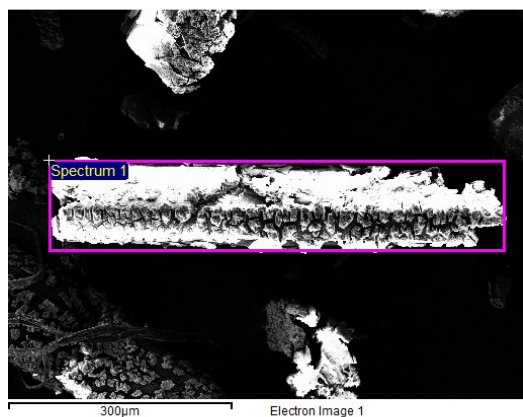

(b)

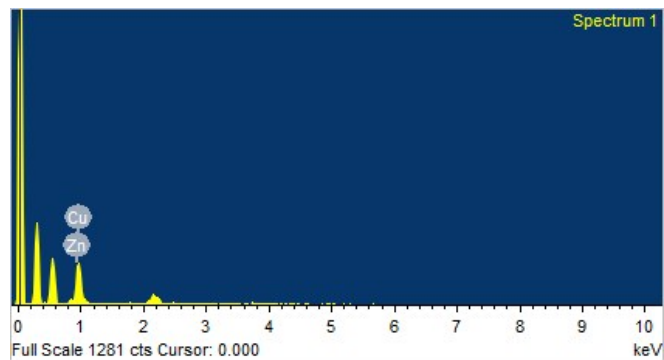

(c)

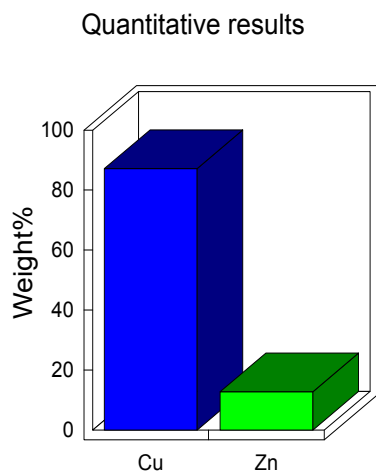

(d)

| Element | Weight% | Atomic% |
|---------|---------|---------|
| Cu L    | 87.20   | 87.52   |
| Zn L    | 12.80   | 12.48   |
| Totals  | 100.00  |         |

**Fig. S5.** (a) SEM image of single crystal of compound 2 in 0.01 M Cu(II) solution. (b) The corresponding EDX plot. (c) Graphical representation (in weight percentages) of the metal content in compound 2. (d) EDX results showing metal composition (as %) in 2, after 5 days of soaking.

## SECTION-4

### Inductively Coupled Plasma (ICP) analysis of compound 2

PBMDJFKBOEKFIC  
NFIDPHJF  
PNCJCCCAEDCJPE  
IBGPLGDF  
PDBCNFCJGEKFII  
DBN|EGBF

Issued to:

**Prof Samar K.Das**

School Of Chemistry

University of Hyderabad, Gachibowli,

Hyderabad-500046

Report No. : LLPL/D/16-17/001590

Issue Date : 26/09/2016

Customer Ref.: TRF

Ref.Date : 22/09/2016

**Sample Particulars : SKD7-1**

**Qty. Received :** 1no Vial

**Test Parameters :** Zinc as Zn

**Date of Receipt of Sample :** 22/09/2016

**Date of Starting of Analysis :** 26/09/2016

**Date of completion of analysis :** 26/09/2016

*SAMPLE TESTED AS RECEIVED*

#### TEST RESULTS

| S.No. | Parameters | UOM       | Results |
|-------|------------|-----------|---------|
| 1     | Zinc as Zn | % by mass | 0.81    |

**Instrument Used:** ICP-OES Varian 720-ES

**NOTE :** This report and results relate only to the sample / items tested.

**Fig. S6.** Inductively Coupled Plasma (ICP) analysis report of compound 2 (in weight percentage).

## SECTION-5

Crystal structure images of compounds 1–3, showing N–N separation within 1,4-bpeb

ligand

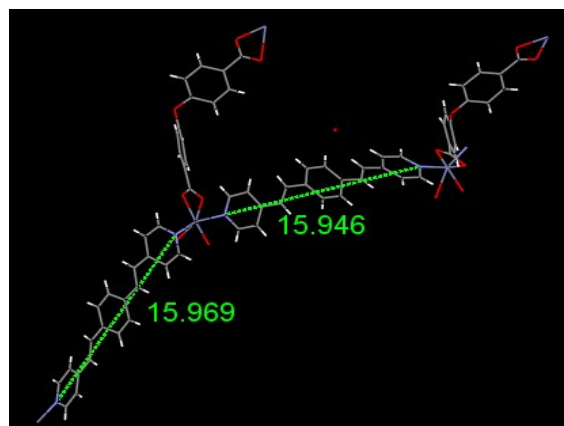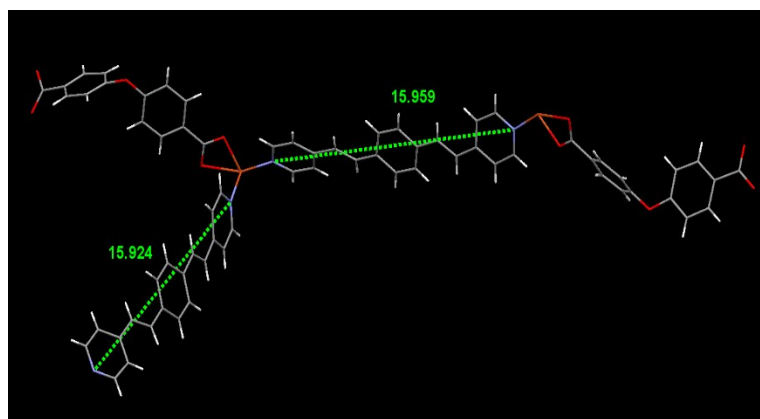

**Compound 1**

**Compound 2**

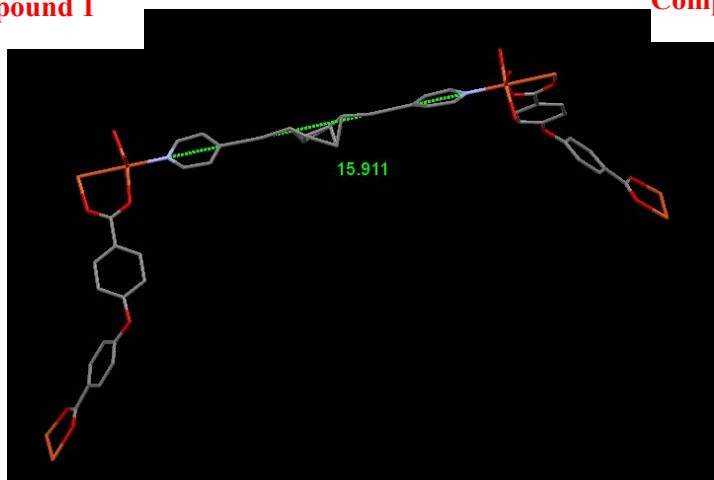

**Compound 3**

**Fig. S7.** Crystal structure features of compounds 1–3; N–N separation between two pyridyl moieties within the 1,4-bpeb ligand in compound 3 is compared with that in the compounds 1 and 2.

## SECTION-6



Optical images of compounds 1 and 2

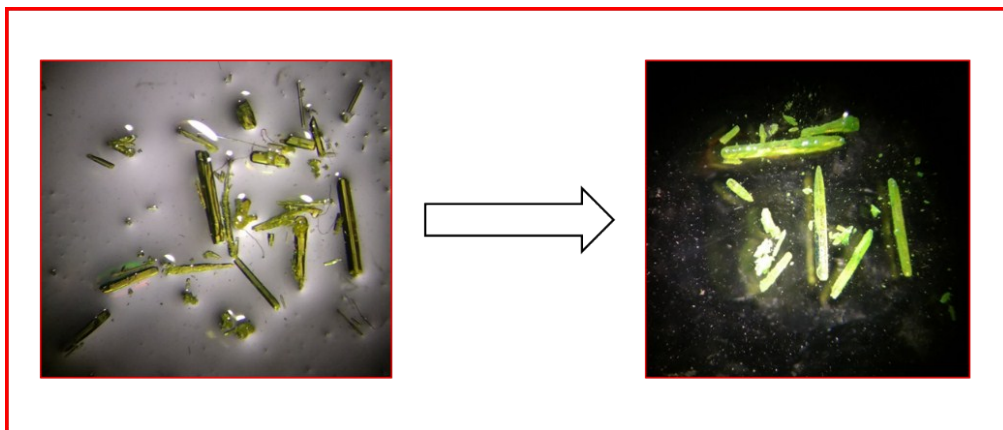

**Fig. S8.** Bulk crystal images of compound **1**, left [Zn(II)-yellow] and compound **2**, right [Cu(II)-green].

**SECTION-7**

## CHNS analysis of compound 1

### FLASH EA 1112 SERIES CHN REPORT THERMO FINNIGAN

Method filename: C:\Program Files\Thermo Finnigan\Eager 300 for EA1112\DATA\Sys\_data\_ex  
Sample ID: SKD-7 (# 23)  
Analysis type: UnkNown  
Chromatogram filename: UNK-12012016-3.dat  
Sample weight: 2.365

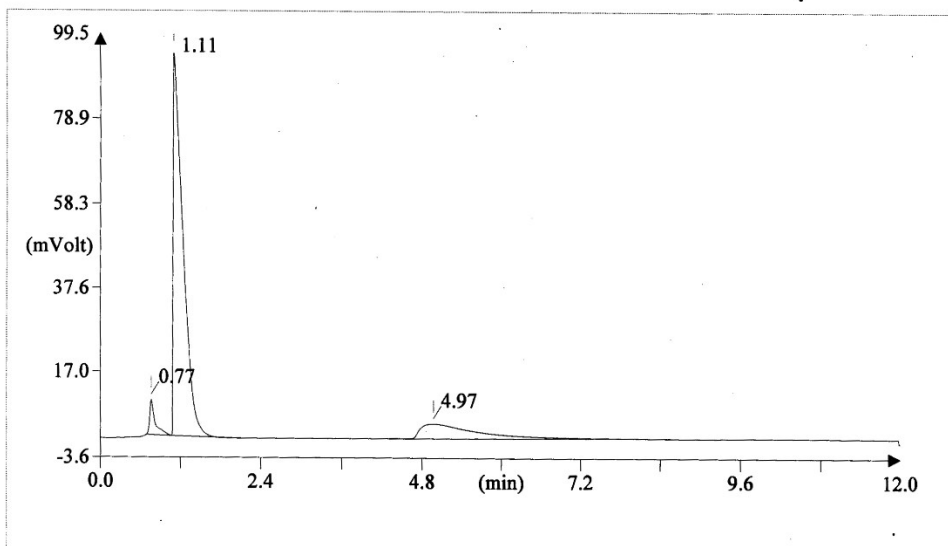

| Element Name | Element % | Ret. Time |
|--------------|-----------|-----------|
| Nitrogen     | 4.51      | 0.77      |
| Carbon       | 66.39     | 1.11      |
| Hydrogen     | 3.98      | 4.97      |

Fig. S9. CHNS analysis report of compound 1.

## CHNS analysis of compound 2.

FLASH EA 1112 SERIES CHN REPORT  
THERMO FINNIGAN

Method filename: C:\Program Files\Thermo Finnigan\Eager 300 for EA1112\DATA\Sys\_data\_ex  
Sample ID: SKD-32 (# 21)  
Analysis type: UnkNown  
Chromatogram filename: UNK-18122018-1.dat  
Sample weight: 2.115

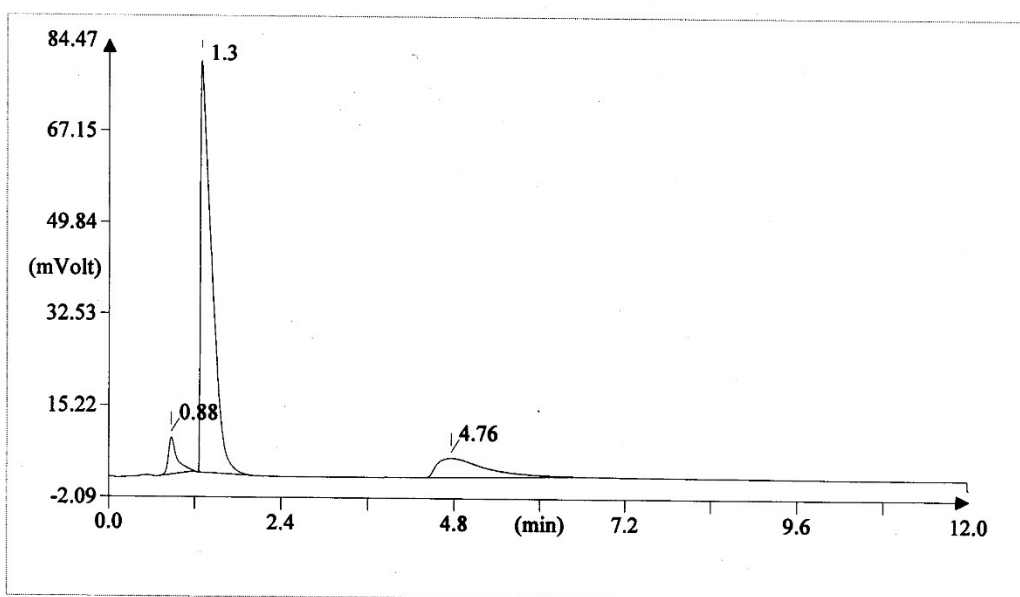

| Element Name | Element % | Ret. Time |
|--------------|-----------|-----------|
| Nitrogen     | 4.54      | 0.88      |
| Carbon       | 66.52     | 1.30      |
| Hydrogen     | 4.16      | 4.76      |

Fig. S10. CHNS analysis report of compound 2.

**CHNS analysis of compound 3.**

# FLASH EA 1112 SERIES CHN REPORT THERMO FINNIGAN

Method filename: C:\Program Files\Thermo Finnigan\Eager 300 for EA1112\DATA\Sys\_data\_ex  
Sample ID: SKD-15 (# 22)  
Analysis type: UnkNown  
Chromatogram filename: UNK-18122018-2.dat  
Sample weight: 1.732

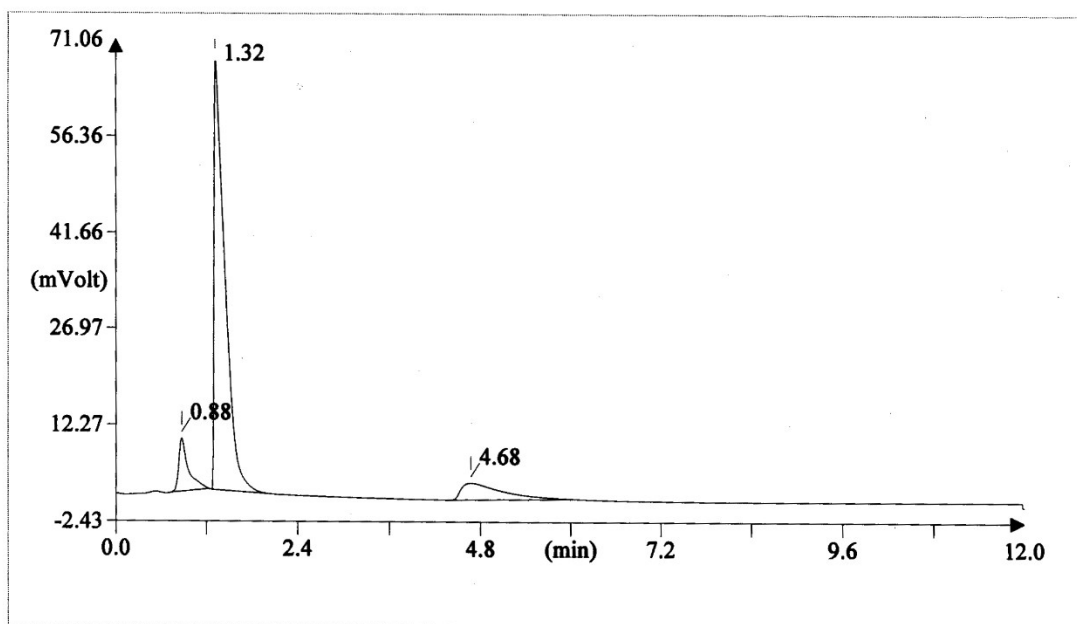

| Element Name | Element % | Ret. Time |
|--------------|-----------|-----------|
| Nitrogen     | 3.08      | 0.88      |
| Carbon       | 62.51     | 1.32      |
| Hydrogen     | 3.45      | 4.67      |

Fig. S11. CHNS analysis report of compound 3.

## SECTION 8

**Infrared (IR) spectrum of compound 1.**

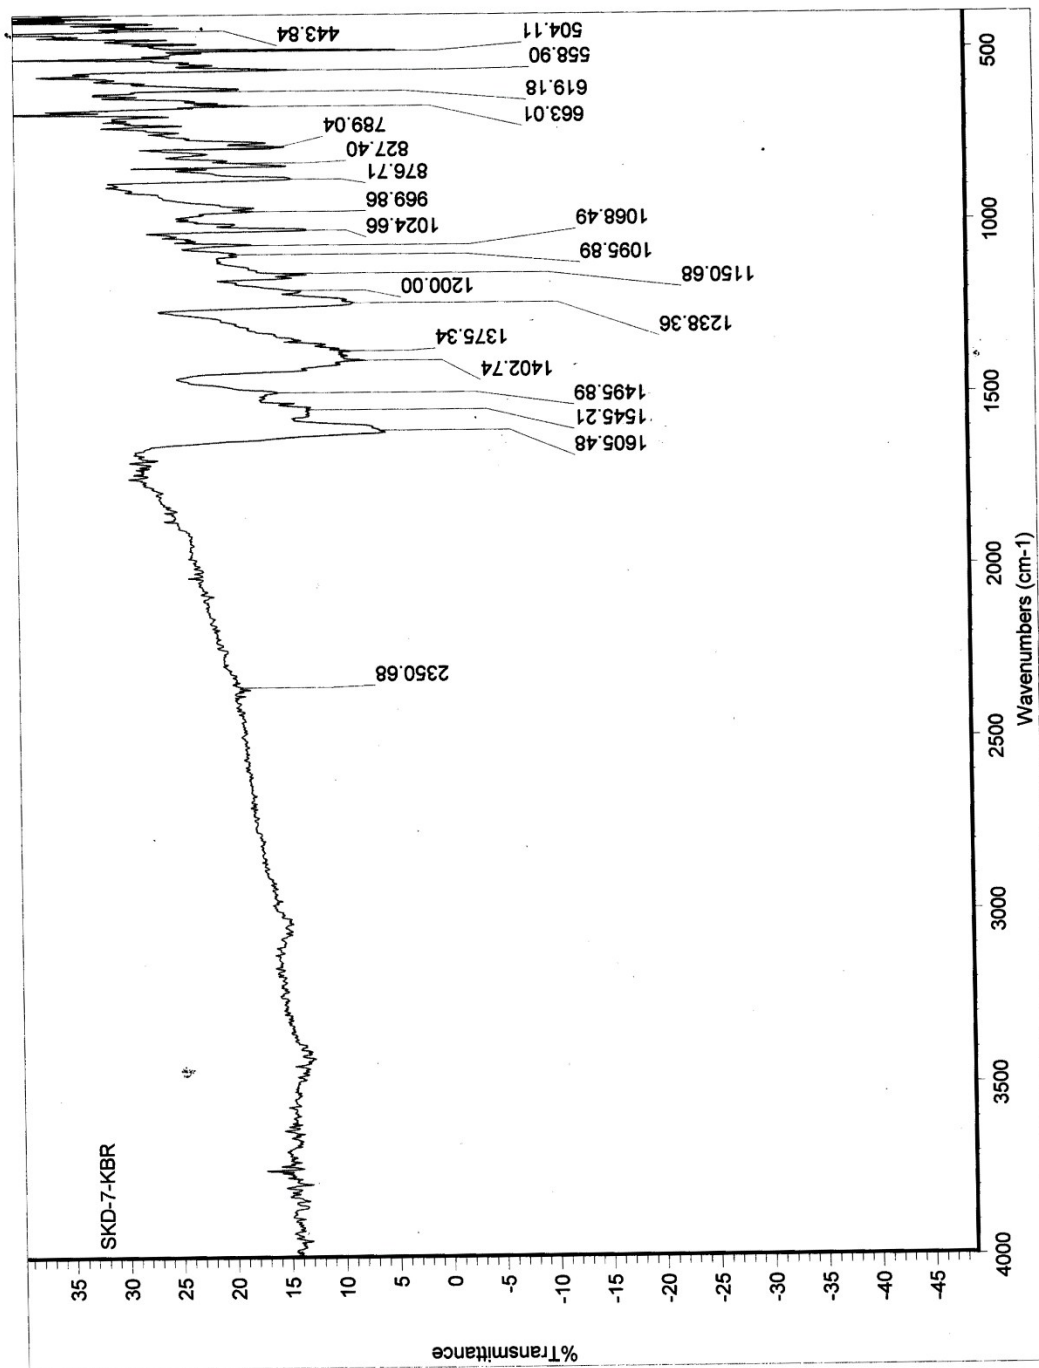

**Fig. S12.** Infrared (IR) spectrum of compound 1.

**Infrared (IR) spectrum of compound 2.**

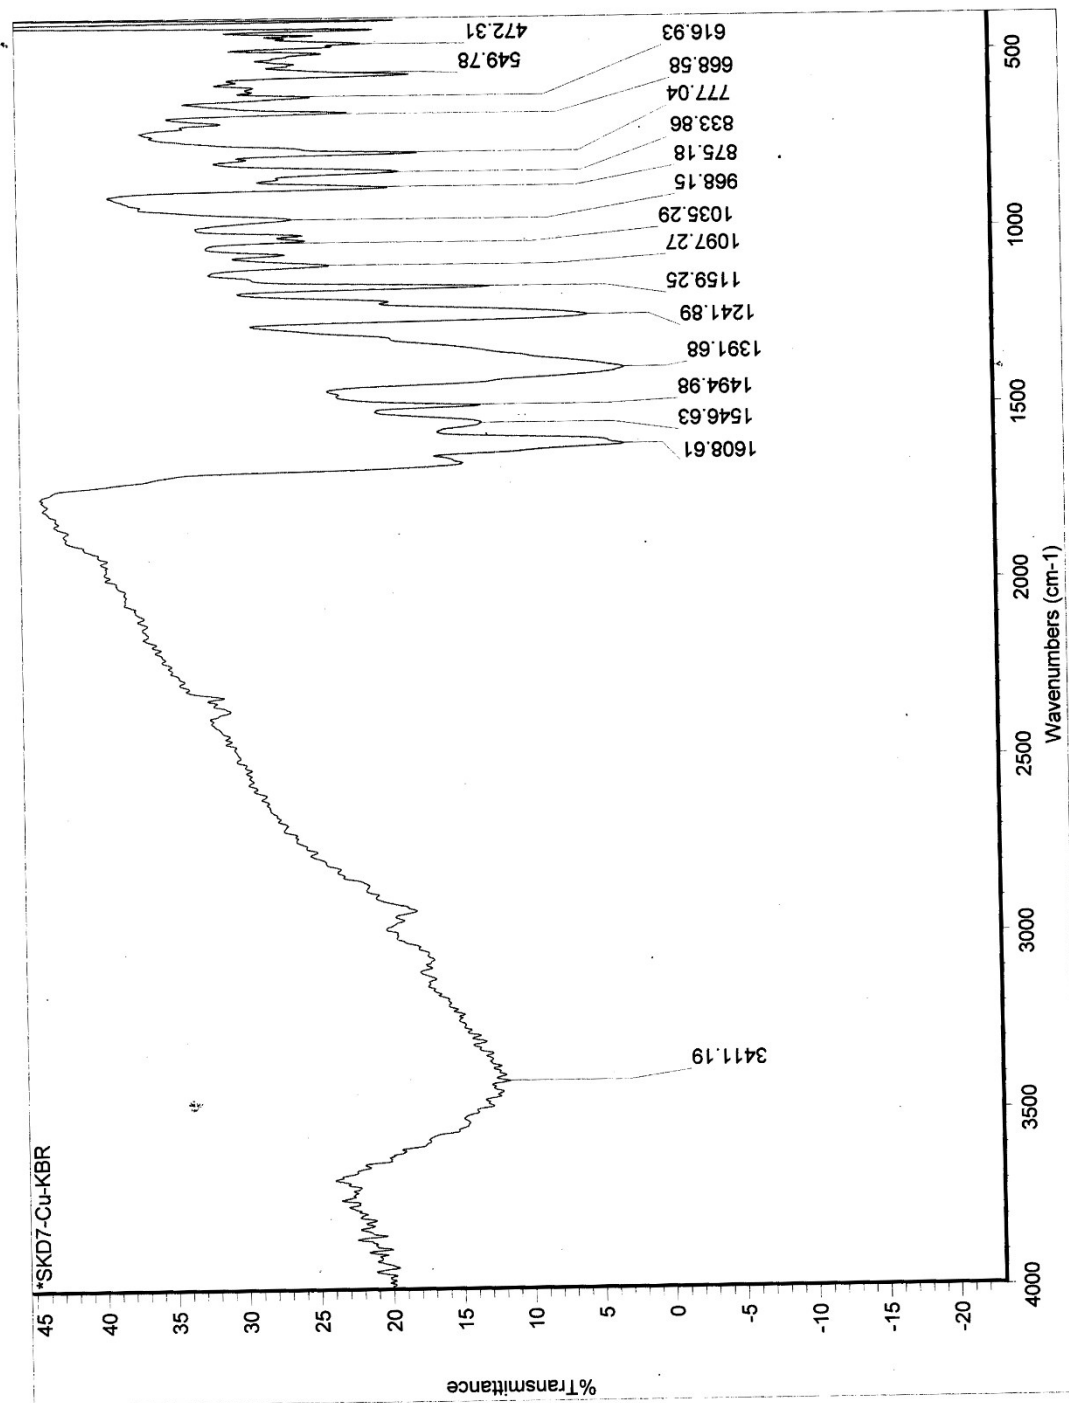

Fig. S13. Infrared (IR) spectrum of compound 2.

**Infrared (IR) spectrum of compound 3.**

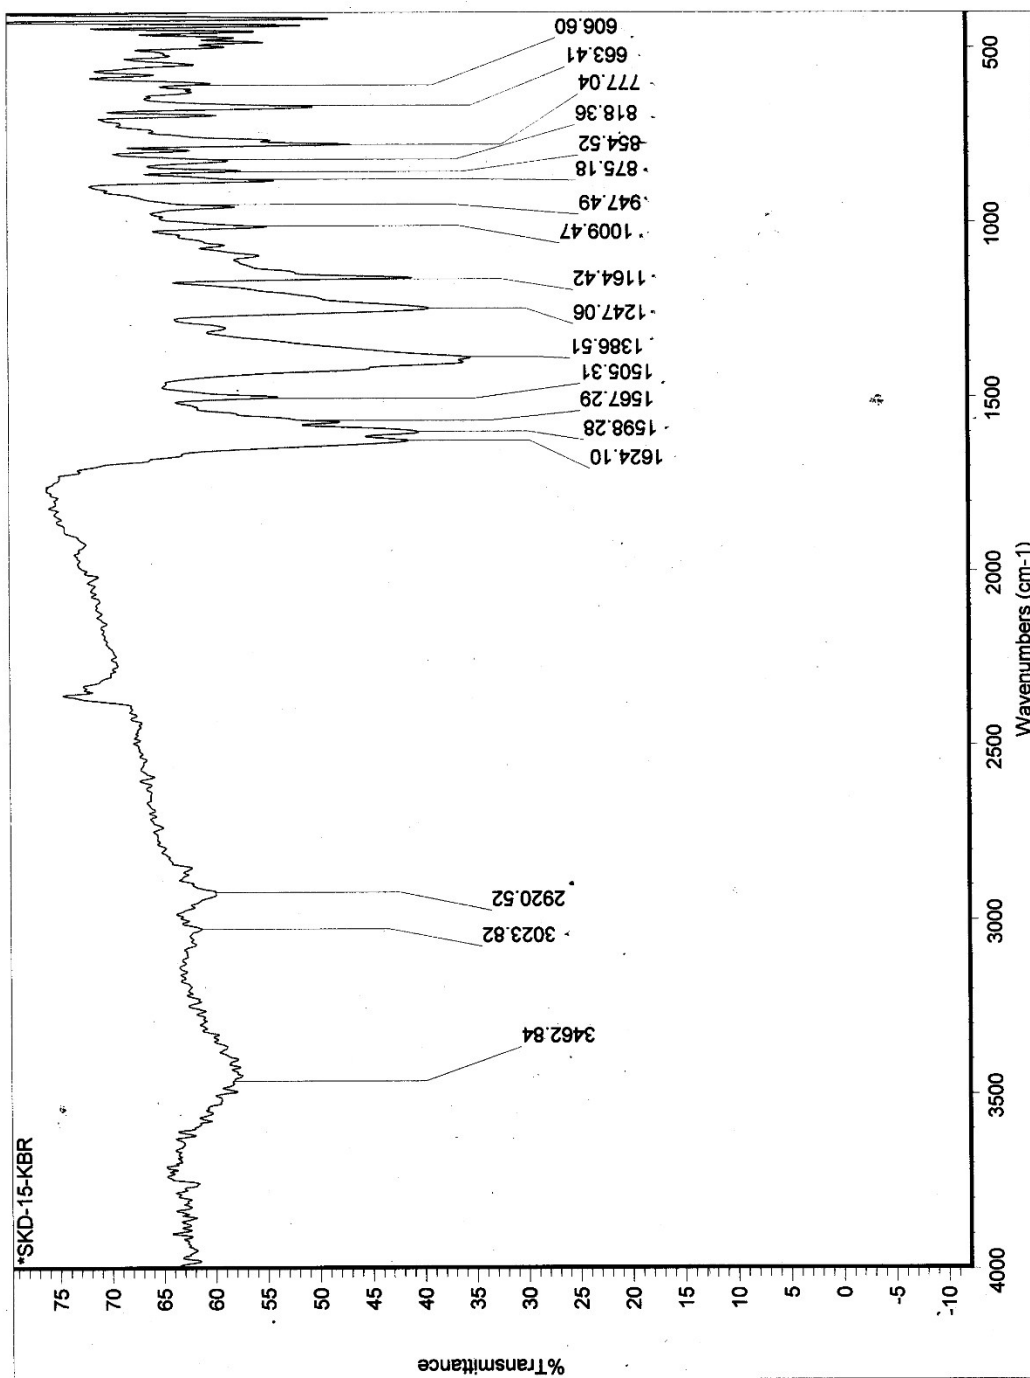

**Fig. S14.** Infrared (IR) spectrum of compound 3.

## SECTION 9

**Table S1: Selected bond lengths and bond angles found in the crystal structures of compounds 1-3.**

### Compound 1

|                 |          |                         |            |
|-----------------|----------|-------------------------|------------|
| Zn(01)-O(10)#1  | 2.039(3) | O(10)#1-Zn(01)-O(6)     | 154.13(13) |
| Zn(01)-O(6)     | 2.061(3) | O(10)#1-Zn(01)-N(2)     | 100.70(13) |
| Zn(01)-N(2)     | 2.066(3) | O(6)-Zn(01)-N(2)        | 98.85(14)  |
| Zn(01)-N(4)#2   | 2.091(3) | O(10)#1-Zn(01)-N(4)#2   | 95.61(12)  |
| Zn(01)-O(9)#1   | 2.339(3) | O(6)-Zn(01)-N(4)#2      | 98.56(13)  |
| Zn(01)-O(7I)    | 2.357(4) | N(2)-Zn(01)-N(4)#2      | 97.26(12)  |
| Zn(01)-C(68T)#1 | 2.498(4) | O(10)#1-Zn(01)-O(9)#1   | 59.75(11)  |
| Zn(02)-O(1B)    | 2.002(4) | O(6)-Zn(01)-O(9)#1      | 104.84(12) |
| Zn(02)-O(4)#3   | 2.035(3) | N(2)-Zn(01)-O(9)#1      | 86.91(12)  |
| Zn(02)-N(3)     | 2.057(3) | N(4)#2-Zn(01)-O(9)#1    | 155.32(12) |
| Zn(02)-N(1A)    | 2.084(3) | O(10)#1-Zn(01)-O(7I)    | 98.54(12)  |
| Zn(02)-O(5C)#3  | 2.442(3) | O(6)-Zn(01)-O(7I)       | 58.17(13)  |
| Zn(02)-C(14W)#3 | 2.558(5) | N(2)-Zn(01)-O(7I)       | 154.12(15) |
| O(10)-C(68T)    | 1.265(5) | N(4)#2-Zn(01)-O(7I)     | 97.91(13)  |
| O(10)-Zn(01)#4  | 2.039(3) | O(9)#1-Zn(01)-O(7I)     | 87.99(12)  |
| O(9)-C(68T)     | 1.243(5) | O(10)#1-Zn(01)-C(68T)#1 | 30.28(13)  |
| O(9)-Zn(01)#4   | 2.339(3) | O(6)-Zn(01)-C(68T)#1    | 132.30(15) |
| N(4)-Zn(01)#5   | 2.091(3) | N(2)-Zn(01)-C(68T)#1    | 92.65(13)  |
| N(3)-C(35)      | 1.348(5) | N(4)#2-Zn(01)-C(68T)#1  | 125.76(15) |
| O(6)-C(55M)     | 1.239(5) | O(9)#1-Zn(01)-C(68T)#1  | 29.56(12)  |
| O(4)-C(14W)     | 1.242(5) | O(7I)-Zn(01)-C(68T)#1   | 95.33(13)  |
| O(4)-Zn(02)#6   | 2.035(3) | O(1B)-Zn(02)-O(4)#3     | 149.87(18) |
| N(1A)-C(19Z)    | 1.327(5) | O(1B)-Zn(02)-N(3)       | 102.01(16) |
| O(1B)-C(1)      | 1.194(7) | O(4)#3-Zn(02)-N(3)      | 101.65(13) |
| O(5C)-Zn(02)#6  | 2.442(3) | O(1B)-Zn(02)-N(1A)      | 98.74(14)  |

---

Symmetry transformations used to generate equivalent atoms:

#1  $-x-1, y+1/2, -z+3/2$  #2  $x, y-1, z+1$  #3  $-x+2, y+1/2, -z+1/2$   
#4  $-x-1, y-1/2, -z+3/2$  #5  $x, y+1, z-1$  #6  $-x+2, y-1/2, -z+1/2$



## Compound 2

|                 |          |                         |            |
|-----------------|----------|-------------------------|------------|
| Cu(01)-O(1)     | 2.040(3) | O(1)-Cu(01)-N(3)        | 100.45(15) |
| Cu(01)-N(3)     | 2.072(4) | O(1)-Cu(01)-O(5)#1      | 155.78(15) |
| Cu(01)-O(5)#1   | 2.086(4) | N(3)-Cu(01)-O(5)#1      | 97.94(17)  |
| Cu(01)-N(1)     | 2.100(4) | O(1)-Cu(01)-N(1)        | 95.39(14)  |
| Cu(01)-O(4F)#1  | 2.317(4) | N(3)-Cu(01)-N(1)        | 97.35(15)  |
| Cu(01)-O(2)     | 2.336(3) | O(5)#1-Cu(01)-N(1)      | 97.75(14)  |
| Cu(01)-C(1M)    | 2.513(5) | O(1)-Cu(01)-O(4F)#1     | 99.22(15)  |
| Cu(01)-C(14V)#1 | 2.526(5) | N(3)-Cu(01)-O(4F)#1     | 153.85(17) |
| Cu(02)-O(6)     | 1.980(4) | O(5)#1-Cu(01)-O(4F)#1   | 58.91(15)  |
| Cu(02)-O(10B)#2 | 2.053(4) | N(1)-Cu(01)-O(4F)#1     | 97.77(15)  |
| Cu(02)-N(2)     | 2.069(4) | O(1)-Cu(01)-O(2)        | 59.69(12)  |
| Cu(02)-N(4A)#3  | 2.094(4) | N(3)-Cu(01)-O(2)        | 86.48(14)  |
| Cu(02)-O(9C)#2  | 2.370(4) | O(5)#1-Cu(01)-O(2)      | 106.19(14) |
| Cu(02)-C(48)#2  | 2.534(7) | N(1)-Cu(01)-O(2)        | 155.02(14) |
| O(1)-C(1M)      | 1.270(5) | O(4F)#1-Cu(01)-O(2)     | 88.74(14)  |
| O(2)-C(1M)      | 1.249(6) | O(1)-Cu(01)-C(1M)       | 30.19(14)  |
| N(1)-C(15I)     | 1.334(5) | N(3)-Cu(01)-C(1M)       | 92.50(16)  |
| N(1)-C(19V)     | 1.342(5) | O(5)#1-Cu(01)-C(1M)     | 133.75(18) |
| O(5)-C(14V)     | 1.264(6) | N(1)-Cu(01)-C(1M)       | 125.46(17) |
| O(5)-Cu(01)#4   | 2.086(4) | O(4F)#1-Cu(01)-C(1M)    | 95.92(15)  |
| N(3)-C(53)      | 1.334(6) | O(2)-Cu(01)-C(1M)       | 29.57(13)  |
| O(6)-C(35)      | 1.215(7) | O(1)-Cu(01)-C(14V)#1    | 127.3(2)   |
| O(10B)-C(48)    | 1.235(7) | N(3)-Cu(01)-C(14V)#1    | 126.7(2)   |
| O(10B)-Cu(02)#6 | 2.053(4) | O(5)#1-Cu(01)-C(14V)#1  | 29.92(17)  |
| O(9C)-C(48)     | 1.246(7) | N(1)-Cu(01)-C(14V)#1    | 99.78(15)  |
| O(9C)-Cu(02)#6  | 2.370(4) | O(4F)#1-Cu(01)-C(14V)#1 | 29.01(16)  |
| O(3D)-C(5X)     | 1.390(5) | O(2)-Cu(01)-C(14V)#1    | 97.52(15)  |
| O(3D)-C(8Z)     | 1.400(6) | C(1M)-Cu(01)-C(14V)#1   | 116.20(19) |

---

Symmetry transformations used to generate equivalent atoms:

#1 -x-1,y+1/2,-z+1/2 #2 -x+2,y-1/2,-z+3/2 #3 x,y+1,z+1

#4 -x-1,y-1/2,-z+1/2 #5 x,y-1,z-1 #6 -x+2,y+1/2,-z+3/2

### Compound 3

|                    |            |                   |          |
|--------------------|------------|-------------------|----------|
| Cu(1)-O(5)         | 1.927(4)   | C(19)-N(1)-C(15)  | 114.7(6) |
| Cu(1)-O(4)         | 1.929(4)   | C(19)-N(1)-Cu(1)  | 122.7(5) |
| Cu(1)-O(2)         | 2.004(4)   | C(15)-N(1)-Cu(1)  | 122.6(5) |
| Cu(1)-O(1)         | 2.008(4)   | C(1)-O(2)-Cu(1)   | 124.0(4) |
| Cu(1)-N(1)         | 2.159(4)   | C(8)-O(1)-Cu(1)   | 123.9(4) |
| Cu(1)-Cu(1)#1      | 2.6473(11) | C(1)#1-O(5)-Cu(1) | 122.2(4) |
| N(1)-C(19)         | 1.275(10)  | C(8)#1-O(4)-Cu(1) | 122.1(4) |
| N(1)-C(15)         | 1.277(10)  |                   |          |
| O(2)-C(1)          | 1.255(7)   |                   |          |
| O(1)-C(8)          | 1.276(7)   |                   |          |
| O(5)-C(1)#1        | 1.247(7)   |                   |          |
| O(4)-C(8)#1        | 1.262(7)   |                   |          |
| O(5)-Cu(1)-O(4)    | 173.07(19) |                   |          |
| O(5)-Cu(1)-O(2)    | 87.61(19)  |                   |          |
| O(4)-Cu(1)-O(2)    | 91.08(16)  |                   |          |
| O(5)-Cu(1)-O(1)    | 91.20(16)  |                   |          |
| O(4)-Cu(1)-O(1)    | 88.07(19)  |                   |          |
| O(2)-Cu(1)-O(1)    | 163.14(16) |                   |          |
| O(5)-Cu(1)-N(1)    | 93.6(2)    |                   |          |
| O(4)-Cu(1)-N(1)    | 93.3(2)    |                   |          |
| O(2)-Cu(1)-N(1)    | 98.7(2)    |                   |          |
| O(1)-Cu(1)-N(1)    | 98.2(2)    |                   |          |
| O(5)-Cu(1)-Cu(1)#1 | 86.33(13)  |                   |          |
| O(4)-Cu(1)-Cu(1)#1 | 86.74(12)  |                   |          |
| O(2)-Cu(1)-Cu(1)#1 | 81.40(12)  |                   |          |

---

Symmetry transformations used to generate equivalent atoms:

#1 -x+1,-y+1,z+0 #2 y+0,-x+3/2,z-3/4 #3 -y+3/2,x+0,z+3/4

#4 -x+0,-y+0,z+0

\*\*\*\*\*End of Supporting Information\*\*\*\*\*
